# Supplementary material for: Structural diversity of lamellar zeolite Nu-6(1)—postsynthesis of delaminated analogues
Source: Royal Society of Chemistry journal article supplement (doi:10.1039/c4dt00120f), 2014-01-01

## Structural Diversity of Lamellar Zeolite Nu-6(1) — Postsynthesis of Delaminated Analogues

Hao Xu, Lili Jia, Haihong Wu,\*Boting Yang, Peng Wu\*

*Shanghai Key Laboratory of Green Chemistry and Chemical Processes, Department of Chemistry, East China Normal University, North Zhongshan Road 3663, Shanghai 200062, China*

*\*Corresponding authors. Tel/Fax: +86-21 62232292; [pwu@chem.ecnu.edu.cn](mailto:pwu@chem.ecnu.edu.cn);*

*[hhwu@chem.ecnu.edu.cn](mailto:hhwu@chem.ecnu.edu.cn)*

Figure S1. XRD pattern of Nu-6(1) (a) and swollen Nu-6(1) at room temperature (b) using 2.4 g TPAOH per gram of Nu-6(1).

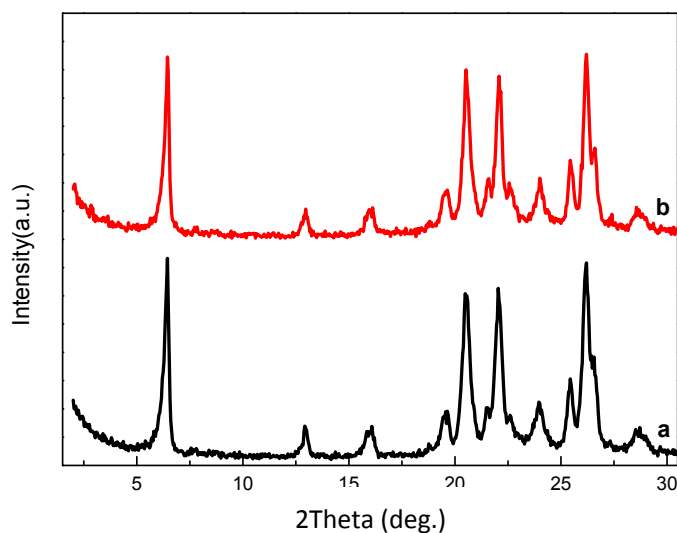

Figure S2.  $^{29}\text{Si}$  NMR spectra deconvolution of Nu-6(1) (a), Nu-6(2) (b), ECNU-4 (c) and Del-Nu-6 (d).

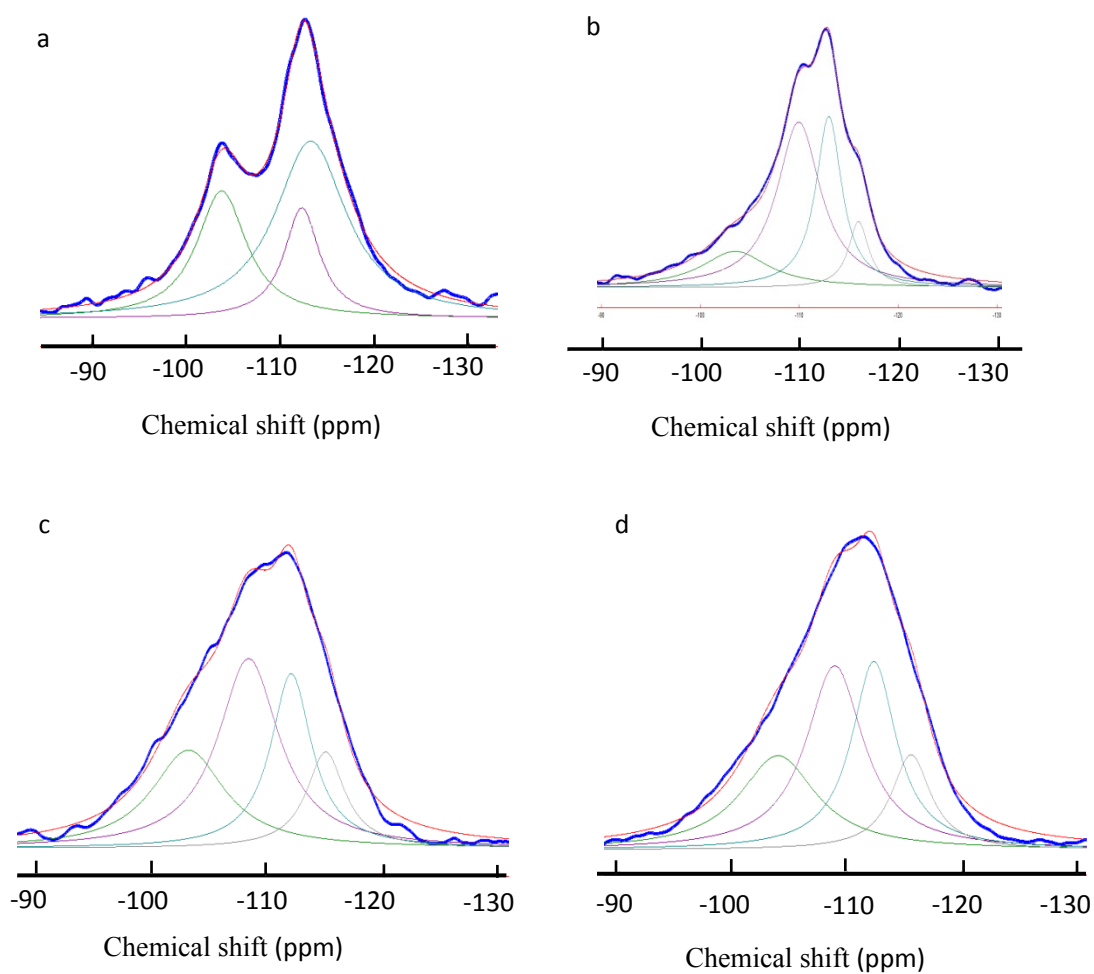

Supplement: c4dt00120f1.pdf [file c4dt00120f1.pdf]
